# Supplementary material
Source: PubMed Central journal article supplement (PMC3811841)
Supplement: IAI.00919-13_zii999090384so1.pdf [file IAI.00919-13_zii999090384so1.pdf]

**Supplementary Table 1.** Analysis of example real-time PCR gene expression data.

---

| <b>Gene</b> | <b>SE-1 (<math>\mu\text{M}</math>)</b> | <b>Ct</b> | <b><math>\Delta\Delta\text{Ct}^1</math></b> | <b><math>\Delta\Delta\text{Ct}^2</math></b> | <b>Average<math>\Delta\Delta\text{Ct}</math></b> | <b>RQ (<math>2^{-\Delta\Delta\text{Ct}}</math>)</b> |
|-------------|----------------------------------------|-----------|---------------------------------------------|---------------------------------------------|--------------------------------------------------|-----------------------------------------------------|
| <i>gapA</i> | 0                                      | 26.70     |                                             | 0                                           | 0                                                | 1                                                   |
| <i>gapA</i> | 20                                     | 27.33     |                                             | 1                                           | 1                                                | 0.5                                                 |
| <i>gapA</i> | 40                                     | 26.76     |                                             | -0.69                                       | -0.69                                            | 0.62                                                |
| <i>rrsA</i> | 0                                      | 18.91     | 0                                           |                                             | 0                                                | 1                                                   |
| <i>rrsA</i> | 20                                     | 18.55     | -1.0                                        |                                             | -1.0                                             | 2                                                   |
| <i>rrsA</i> | 40                                     | 18.29     | 0.69                                        |                                             | 0.69                                             | 1.62                                                |
| <i>virB</i> | 0                                      | 22.00     | 0                                           | 0                                           | 0                                                | 1                                                   |
| <i>virB</i> | 20                                     | 23.26     | 0.63                                        | 1.63                                        | 1.13                                             | 0.46                                                |
| <i>virB</i> | 40                                     | 23.18     | 1.12                                        | 1.81                                        | 1.47                                             | 0.36                                                |
| <i>icsA</i> | 0                                      | 27.70     | 0                                           | 0                                           | 0                                                | 1                                                   |
| <i>icsA</i> | 20                                     | 27.88     | -0.46                                       | 0.54                                        | 0.04                                             | 0.97                                                |
| <i>icsA</i> | 40                                     | 28.59     | 0.82                                        | 1.52                                        | 1.17                                             | 0.44                                                |
| <i>icsB</i> | 0                                      | 26.17     | 0                                           | 0                                           | 0                                                | 1                                                   |
| <i>icsB</i> | 20                                     | 26.25     | -0.56                                       | 0.44                                        | -0.06                                            | 1.04                                                |
| <i>icsB</i> | 40                                     | 27.04     | 0.80                                        | 1.49                                        | 1.14                                             | 0.45                                                |
| <i>ipaB</i> | 0                                      | 24.32     | 0                                           | 0                                           | 0                                                | 1                                                   |
| <i>ipaB</i> | 20                                     | 25.57     | 0.62                                        | 1.61                                        | 1.11                                             | 0.46                                                |
| <i>ipaB</i> | 40                                     | 26.23     | 1.85                                        | 2.54                                        | 2.20                                             | 0.22                                                |

---

<sup>1</sup> $\Delta\Delta C_t$  values after normalizing data to *gapA*

<sup>2</sup> $\Delta\Delta C_t$  values after normalizing data to *rrsA*

$$\Delta\Delta C_t = (C_{t,Target} - C_{t,Internal Control})_{SE-1} - (C_{t,Target} - C_{t, Internal Control})_{no SE-1}$$

The values in the table are for a single replicate. The RQ values from three such replicates were averaged to get the average gene expression levels and to calculate the standard error.

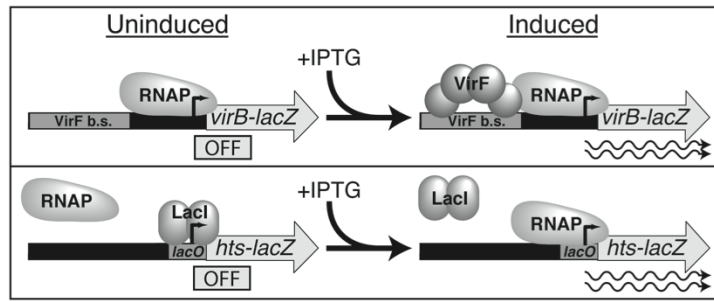

**Supplementary Fig. 1. Reporter fusions used for *in vivo* assays.** VirF-activated *virB-lacZ* fusion (Top) and LacI-repressed *hts-lacZ* control fusion (Bottom), each shown in their uninduced (-) IPTG state (left) and their induced (+) IPTG state (right). Gray rectangles: VirF and LacI (*lacO*) binding sites. Gray arrows: *lacZ* gene expressed from *virB* or synthetic *hts* promoter. Thick black/gray lines: Promoter region DNA. Right angle black arrows: Transcription start sites. Rounded gray shapes: RNAP, VirF or LacI proteins. Wavy lines: active transcription in the presence of IPTG.

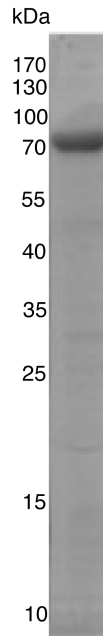

**Supplementary Fig. 2. MBP-VirF protein after purification using amylose affinity chromatography.** The image represents a single lane of a 12% SDS-PAGE gel stained with Coomassie Brilliant Blue. Numbers to the left of the gel indicate the positions of protein standards with the indicated molecular masses. MBP-VirF protein has a predicted molecular mass of 73 kDa.

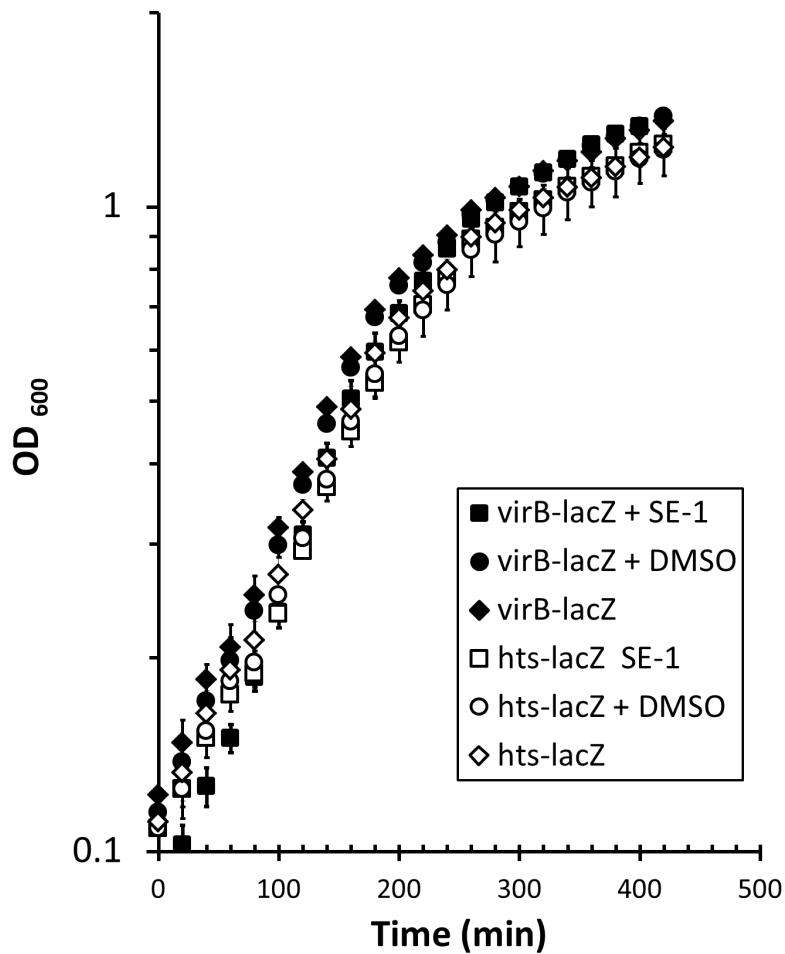

**Supplementary Fig. 3. Growth curves of *E. coli* strains in the absence or presence of SE-1.**

Strains carrying *virB-lacZ* and VirF expressed from pHG165 (SME4382, squares) or *hts-lacZ* and LacI expressed from pHG165 (SME3359, circles) grown in the absence (-) or presence (+) of SE-1 (44  $\mu$ M), or the absence or presence of DMSO (0.3%). Results are the average of three replicates, error bars represent the standard error of the mean.

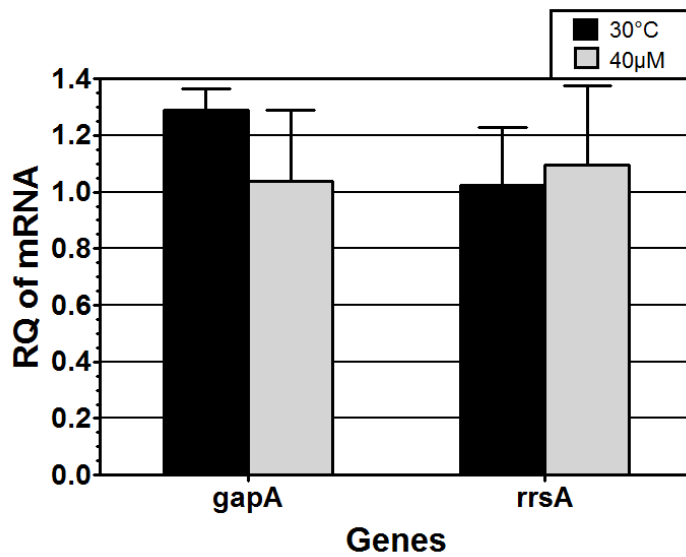

**Supplementary Fig. 4. Relative quantification of mRNA levels of the constitutively expressed genes *gapA* and *rrsA* of *Shigella*.** Levels of *gapA* were normalized to the *rrsA* values, and *vice versa*. Cultures were grown at 30°C (Black bars) or at 37°C with 40 μM SE-1 (Grey bars). Values are relative to the mRNA levels of *gapA* (for *gapA*) or *rrsA* (for *rrsA*) for *Shigella* grown at 37°C with no SE-1, which were set to one. Error bars represent the standard error of the mean calculated from three independent replicates.

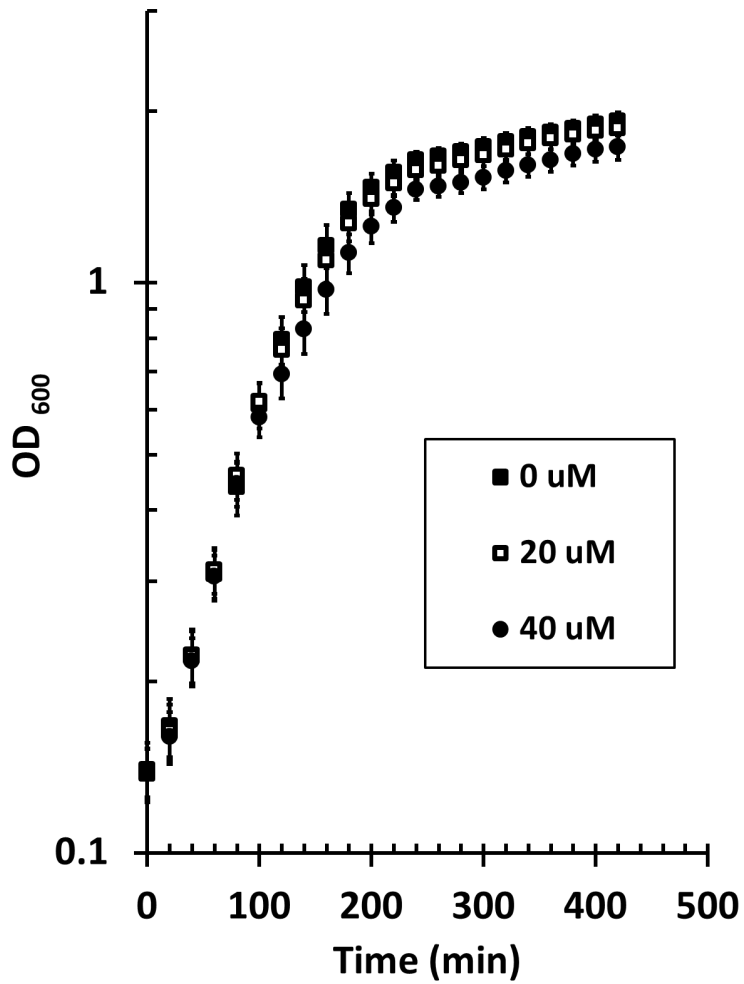

**Supplementary Fig. 5. Growth curves of *Shigella* in the absence or presence of SE-1.**

*Shigella* strain carrying *ipgD*<sup>-</sup> (SME4331) in the absence (filled square) or presence of SE-1 (20  $\mu$ M, open squares; 40  $\mu$ M, filled circles). Results are the average of three replicates, error bars represent the standard error of the mean.

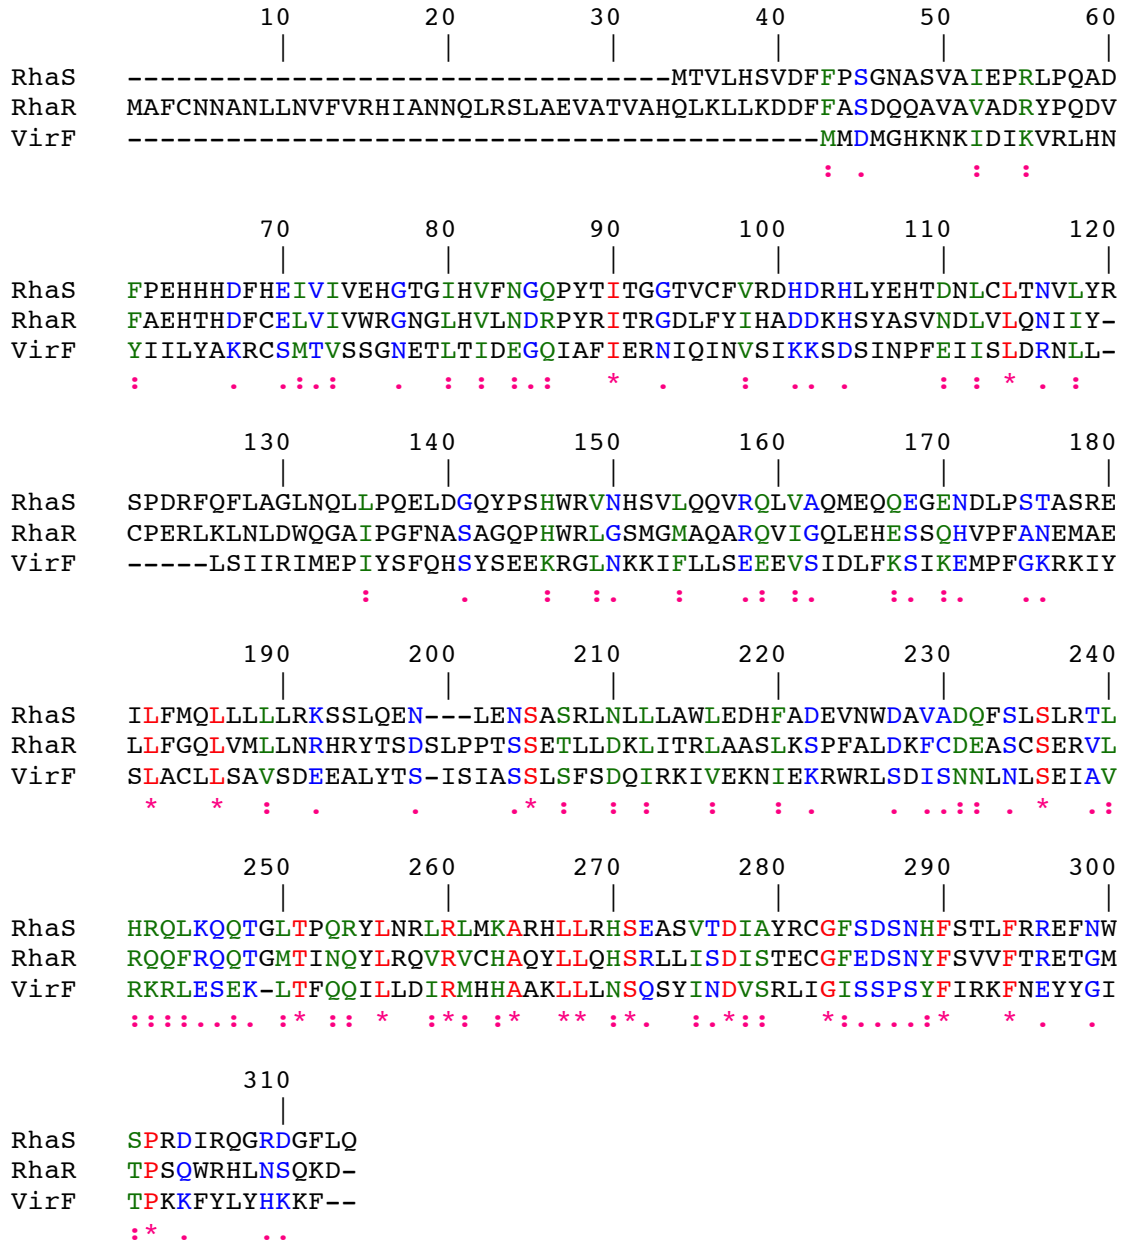

**Supplementary Fig. 6. Alignment of RhaS, RhaR and VirF protein sequences.** Sequences were aligned using ClustalW. Identical positions are red and marked “\*”; strongly similar positions are green and marked “:”; weakly similar positions are blue and marked “.”; different positions are black and unmarked. Gaps in the alignment are marked “-”.
